# Supplementary material
Source: Springer Nature journal article supplement (https://www.springermedizin.de/resource/supplementary/12889_2013_5851_MOESM5_ESM.pdf/9496392)
Supplement: MOESM5 [file 9496392]

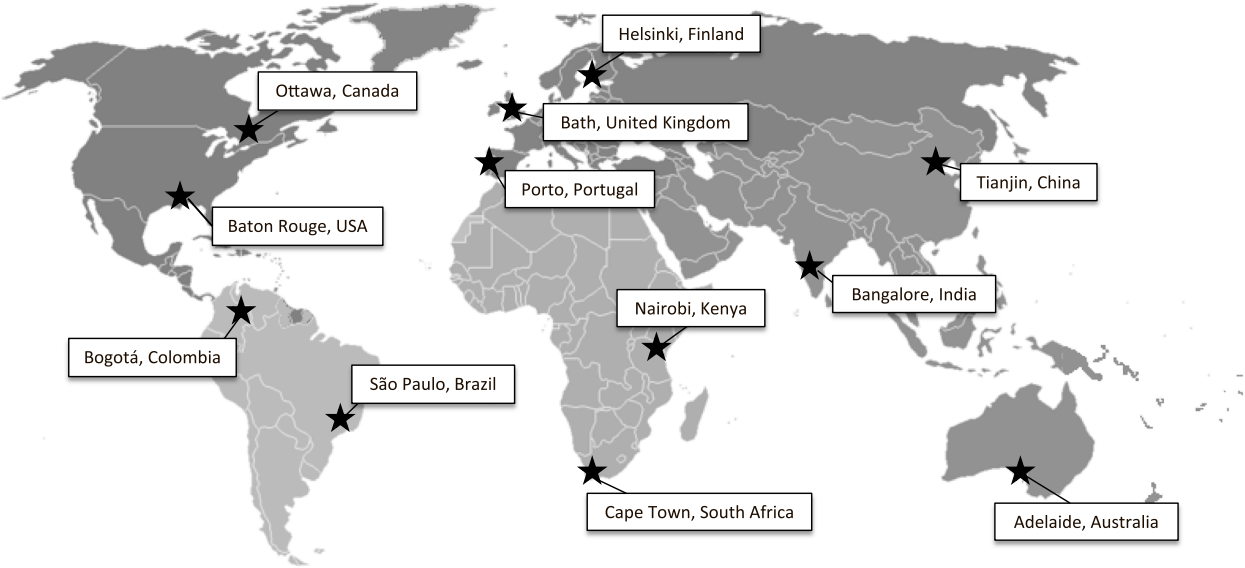

Helsinki, Finland

Ottawa, Canada

Bath, United Kingdom

Tianjin, China

Baton Rouge, USA

Porto, Portugal

Bangalore, India

Bogotá, Colombia

Nairobi, Kenya

São Paulo, Brazil

Cape Town, South Africa

Adelaide, Australia
